# Supplementary material for: Effects of Contagious Respiratory Pathogens on Breath Biomarkers
Source: MDPI journal article supplement (doi:10.3390/antiox13020172), 2024-01-29
Supplement: s1 [file s1]

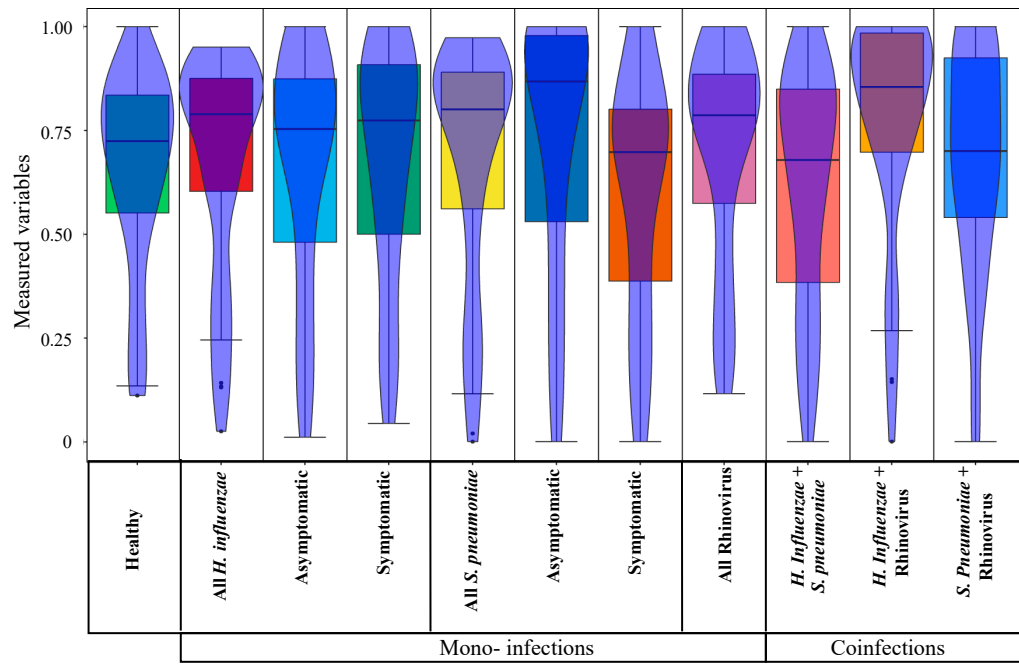

**Figure S1: Violin plots based on measured variables presented in the heat map.** Group and sub-group wise cumulative distribution of normalised variables from Figure 1 is presented here. Plots are depicting overall expressions of measured independent variables (VOCs) in each group and between multiple groups.

**Table S1: Sum formulas and protonated masses of potentially exogenous VOCs**

| Sum formula | Mass    |
|-------------|---------|
| (C3H4)H+    | 41.034  |
| (C3H6)H+    | 43.046  |
| (CH2O2)H+   | 47.017  |
| (C3H4O)H+   | 57.041  |
| (C4H8)H+    | 57.072  |
| (C5H6)H+    | 67.057  |
| (C5H10)H+   | 71.082  |
| (C6H6)H+    | 79.051  |
| (C6H8)H+    | 81.070  |
| (C6H10)H+   | 83.079  |
| (C5H8O)H+   | 85.059  |
| (C6H12)H+   | 85.103  |
| (C7H8)H+    | 93.054  |
| (C6H6O)H+   | 95.055  |
| (C6H8O)H+   | 97.089  |
| (C8H8)H+    | 105.063 |
| (C8H10)H+   | 107.064 |
| (C8H12)H+   | 109.092 |
| (C7H10O)H+  | 111.100 |
| (C9H10)H+   | 119.077 |
| (C8H8O)H+   | 121.062 |
| (C7H6O2)H+  | 123.044 |
| (C9H10O)H+  | 135.070 |
| (C10H12O)H+ | 149.056 |
| (C10H22O)H+ | 159.094 |

**Table S2: Overview for all 44 quantified VOCs with group-wise median and percentiles in the expiration.**

| Sum formula |                             | Healthy (n=256) |                             | ABR H. Influenza (n=97) |                             | Asymptomatic H. Influenza (n=55) |                             | Symptomatic H. Influenza (n=42) |                             | AB S. pneumoniae (n=40) |                             | Asymptomatic S. pneumoniae (n=25) |                             | Symptomatic S. pneumoniae (n=15) |                             | AB Rhinovirus (n=34) |                             | H. Influenza + S. pneumoniae (n=24) |                             | H. Influenza + Rhinovirus (n=16) |                             | S. pneumoniae + Rhinovirus (n=12) |                             |
|-------------|-----------------------------|-----------------|-----------------------------|-------------------------|-----------------------------|----------------------------------|-----------------------------|---------------------------------|-----------------------------|-------------------------|-----------------------------|-----------------------------------|-----------------------------|----------------------------------|-----------------------------|----------------------|-----------------------------|-------------------------------------|-----------------------------|----------------------------------|-----------------------------|-----------------------------------|-----------------------------|
| Median      | 25 <sup>th</sup> Percentile | Median          | 25 <sup>th</sup> Percentile | Median                  | 25 <sup>th</sup> Percentile | Median                           | 25 <sup>th</sup> Percentile | Median                          | 25 <sup>th</sup> Percentile | Median                  | 25 <sup>th</sup> Percentile | Median                            | 25 <sup>th</sup> Percentile | Median                           | 25 <sup>th</sup> Percentile | Median               | 25 <sup>th</sup> Percentile | Median                              | 25 <sup>th</sup> Percentile | Median                           | 25 <sup>th</sup> Percentile | Median                            | 25 <sup>th</sup> Percentile |
| 23.18       | 13.60                       | 81.88           | 16.53                       | 117.89                  | 39.38                       | 174.93                           | 12.53                       | 87.68                           | 167.47                      | 117.03                  | 36.48                       | 178.38                            | 110.79                      | 36.48                            | 178.38                      | 110.79               | 36.48                       | 178.38                              | 110.79                      | 36.48                            | 178.38                      | 110.79                            | 36.48                       |
| 23.18       | 13.60                       | 81.88           | 16.53                       | 117.89                  | 39.38                       | 174.93                           | 12.53                       | 87.68                           | 167.47                      | 117.03                  | 36.48                       | 178.38                            | 110.79                      | 36.48                            | 178.38                      | 110.79               | 36.48                       | 178.38                              | 110.79                      | 36.48                            | 178.38                      | 110.79                            | 36.48                       |
| 23.18       | 13.60                       | 81.88           | 16.53                       | 117.89                  | 39.38                       | 174.93                           | 12.53                       | 87.68                           | 167.47                      | 117.03                  | 36.48                       | 178.38                            | 110.79                      | 36.48                            | 178.38                      | 110.79               | 36.48                       | 178.38                              | 110.79                      | 36.48                            | 178.38                      | 110.79                            | 36.48                       |
| 23.18       | 13.60                       | 81.88           | 16.53                       | 117.89                  | 39.38                       | 174.93                           | 12.53                       | 87.68                           | 167.47                      | 117.03                  | 36.48                       | 178.38                            | 110.79                      | 36.48                            | 178.38                      | 110.79               | 36.48                       | 178.38                              | 110.79                      | 36.48                            | 178.38                      | 110.79                            | 36.48                       |
| 23.18       | 13.60                       | 81.88           | 16.53                       | 117.89                  | 39.38                       | 174.93                           | 12.53                       | 87.68                           | 167.47                      | 117.03                  | 36.48                       | 178.38                            | 110.79                      | 36.48                            | 178.38                      | 110.79               | 36.48                       | 178.38                              | 110.79                      | 36.48                            | 178.38                      | 110.79                            | 36.48                       |
| 23.18       | 13.60                       | 81.88           | 16.53                       | 117.89                  | 39.38                       | 174.93                           | 12.53                       | 87.68                           | 167.47                      | 117.03                  | 36.48                       | 178.38                            | 110.79                      | 36.48                            | 178.38                      | 110.79               | 36.48                       | 178.38                              | 110.79                      | 36.48                            | 178.38                      | 110.79                            | 36.48                       |
| 23.18       | 13.60                       | 81.88           | 16.53                       | 117.89                  | 39.38                       | 174.93                           | 12.53                       | 87.68                           | 167.47                      | 117.03                  | 36.48                       | 178.38                            | 110.79                      | 36.48                            | 178.38                      | 110.79               | 36.48                       | 178.38                              | 110.79                      | 36.48                            | 178.38                      | 110.79                            | 36.48                       |
| 23.18       | 13.60                       | 81.88           | 16.53                       | 117.89                  | 39.38                       | 174.93                           | 12.53                       | 87.68                           | 167.47                      | 117.03                  | 36.48                       | 178.38                            | 110.79                      | 36.48                            | 178.38                      | 110.79               | 36.48                       | 178.38                              | 110.79                      | 36.48                            | 178.38                      | 110.79                            | 36.48                       |
| 23.18       | 13.60                       | 81.88           | 16.53                       | 117.89                  | 39.38                       | 174.93                           | 12.53                       | 87.68                           | 167.47                      | 117.03                  | 36.48                       | 178.38                            | 110.79                      | 36.48                            | 178.38                      | 110.79               | 36.48                       | 178.38                              | 110.79                      | 36.48                            | 178.38                      | 110.79                            | 36.48                       |
| 23.18       | 13.60                       | 81.88           | 16.53                       | 117.89                  | 39.38                       | 174.93                           | 12.53                       | 87.68                           | 167.47                      | 117.03                  | 36.48                       | 178.38                            | 110.79                      | 36.48                            | 178.38                      | 110.79               | 36.48                       | 178.38                              | 110.79                      | 36.48                            | 178.38                      | 110.79                            | 36.48                       |
| 23.18       | 13.60                       | 81.88           | 16.53                       | 117.89                  | 39.38                       | 174.93                           | 12.53                       | 87.68                           | 167.47                      | 117.03                  | 36.48                       | 178.38                            | 110.79                      | 36.48                            | 178.38                      | 110.79               | 36.48                       | 178.38                              | 110.79                      | 36.48                            | 178.38                      | 110.79                            | 36.48                       |
| 23.18       | 13.60                       | 81.88           | 16.53                       | 117.89                  | 39.38                       | 174.93                           | 12.53                       | 87.68                           | 167.47                      | 117.03                  | 36.48                       | 178.38                            | 110.79                      | 36.48                            | 178.38                      | 110.79               | 36.48                       | 178.38                              | 110.79                      | 36.48                            | 178.38                      | 110.79                            | 36.48                       |
| 23.18       | 13.60                       | 81.88           | 16.53                       | 117.89                  | 39.38                       | 174.93                           | 12.53                       | 87.68                           | 167.47                      | 117.03                  | 36.48                       | 178.38                            | 110.79                      | 36.48                            | 178.38                      | 110.79               | 36.48                       | 178.38                              | 110.79                      | 36.48                            | 178.38                      | 110.79                            | 36.48                       |
| 23.18       | 13.60                       | 81.88           | 16.53                       | 117.89                  | 39.38                       | 174.93                           | 12.53                       | 87.68                           | 167.47                      | 117.03                  | 36.48                       | 178.38                            | 110.79                      | 36.48                            | 178.38                      | 110.79               | 36.48                       | 178.38                              | 110.79                      | 36.48                            | 178.38                      | 110.79                            | 36.48                       |
| 23.18       | 13.60                       | 81.88           | 16.53                       | 117.89                  | 39.38                       | 174.93                           | 12.53                       | 87.68                           | 167.47                      | 117.03                  | 36.48                       | 178.38                            | 110.79                      | 36.48                            | 178.38                      | 110.79               | 36.48                       | 178.38                              | 110.79                      | 36.48                            | 178.38                      | 110.79                            | 36.48                       |
| 23.18       | 13.60                       | 81.88           | 16.53                       | 117.89                  | 39.38                       | 174.93                           | 12.53                       | 87.68                           | 167.47                      | 117.03                  | 36.48                       | 178.38                            | 110.79                      | 36.48                            | 178.38                      | 110.79               | 36.48                       | 178.38                              | 110.79                      | 36.48                            | 178.38                      | 110.79                            | 36.48                       |
| 23.18       | 13.60                       | 81.88           | 16.53                       | 117.89                  | 39.38                       | 174.93                           | 12.53                       | 87.68                           | 167.47                      | 117.03                  | 36.48                       | 178.38                            | 110.79                      | 36.48                            | 178.38                      | 110.79               | 36.48                       | 178.38                              | 110.79                      | 36.48                            | 178.38                      | 110.79                            | 36.48                       |
| 23.18       | 13.60                       | 81.88           | 16.53                       | 117.89                  | 39.38                       | 174.93                           | 12.53                       | 87.68                           | 167.47                      | 117.03                  | 36.48                       | 178.38                            | 110.79                      | 36.48                            | 178.38                      | 110.79               | 36.48                       | 178.38                              | 110.79                      | 36.48                            | 178.38                      | 110.79                            | 36.48                       |
| 23.18       | 13.60                       | 81.88           | 16.53                       | 117.89                  | 39.38                       | 174.93                           | 12.53                       | 87.68                           | 167.47                      | 117.03                  | 36.48                       | 178.38                            | 110.79                      | 36.48                            | 178.38                      | 110.79               | 36.48                       | 178.38                              | 110.79                      | 36.48                            | 178.38                      | 110.79                            | 36.48                       |
| 23.18       | 13.60                       | 81.88           | 16.53                       | 117.89                  | 39.38                       | 174.93                           | 12.53                       | 87.68                           | 167.47                      | 117.03                  | 36.48                       | 178.38                            | 110.79                      | 36.48                            | 178.38                      | 110.79               | 36.48                       | 178.38                              | 110.79                      | 36.48                            | 178.38                      | 110.79                            | 36.48                       |
| 23.18       | 13.60                       | 81.88           | 16.53                       | 117.89                  | 39.38                       | 174.93                           | 12.53                       | 87.68                           | 167.47                      | 117.03                  | 36.48                       | 178.38                            | 110.79                      | 36.48                            | 178.38                      | 110.79               | 36.48                       | 178.38                              | 110.79                      | 36.48                            | 178.38                      | 110.79                            | 36.48                       |
| 23.18       | 13.60                       | 81.88           | 16.53                       | 117.89                  | 39.38                       | 174.93                           | 12.53                       | 87.68                           | 167.47                      | 117.03                  | 36.48                       | 178.38                            | 110.79                      | 36.48                            | 178.38                      | 110.79               | 36.48                       | 178.38                              | 110.79                      | 36.48                            | 178.38                      | 110.79                            | 36.48                       |
| 23.18       | 13.60                       | 81.88           | 16.53                       | 117.89                  | 39.38                       | 174.93                           | 12.53                       | 87.68                           | 167.47                      | 117.03                  | 36.48                       | 178.38                            | 110.79                      | 36.48                            | 178.38                      | 110.79               | 36.48                       | 178.38                              | 110.79                      | 36.48                            | 178.38                      | 110.79                            | 36.48                       |
| 23.18       | 13.60                       | 81.88           | 16.53                       | 117.89                  | 39.38                       | 174.93                           | 12.53                       | 87.68                           | 167.47                      | 117.03                  | 36.48                       | 178.38                            | 110.79                      | 36.48                            | 178.38                      | 110.79               | 36.48                       | 178.38                              | 110.79                      | 36.48                            | 178.38                      | 110.79                            | 36.48                       |
| 23.18       | 13.60                       | 81.88           | 16.53                       | 117.89                  | 39.38                       | 174.93                           | 12.53                       | 87.68                           | 167.47                      | 117.03                  | 36.48                       | 178.38                            | 110.79                      | 36.48                            | 178.38                      | 110.79               | 36.48                       | 178.38                              | 110.79                      | 36.48                            | 178.38                      | 110.79                            | 36.48                       |
| 23.18       | 13.60                       | 81.88           | 16.53                       | 117.89                  | 39.38                       | 174.93                           | 12.53                       | 87.68                           | 167.47                      | 117.03                  | 36.48                       | 178.38                            | 110.79                      | 36.48                            | 178.38                      | 110.79               | 36.48                       | 178.38                              | 110.79                      | 36.48                            | 178.38                      | 110.79                            | 36.48                       |
| 23.18       | 13.60                       | 81.88           | 16.53                       | 117.89                  | 39.38                       | 174.93                           | 12.53                       | 87.68                           | 167.47                      | 117.03                  | 36.48                       | 178.38                            | 110.79                      | 36.48                            | 178.38                      | 110.79               | 36.48                       | 178.38                              | 110.79                      | 36.48                            | 178.38                      | 110.79                            | 36.48                       |
| 23.18       | 13.60                       | 81.88           | 16.53                       | 117.89                  | 39.38                       | 174.93                           | 12.53                       | 87.68                           | 167.47                      | 117.03                  | 36.48                       | 178.38                            | 110.79                      | 36.48                            | 178.38                      | 110.79               | 36.48                       | 178.38                              | 110.79                      | 36.48                            | 178.38                      | 110.79                            | 36.48                       |
| 23.18       | 13.60                       | 81.88           | 16.53                       | 117.89                  | 39.38                       | 174.93                           | 12.53                       | 87.68                           | 167.47                      | 117.03                  | 36.48                       | 178.38                            | 110.79                      | 36.48                            | 178.38                      | 110.79               | 36.48                       | 178.38                              | 110.79                      | 36.48                            | 178.38                      | 110.79                            | 36.48                       |
| 23.18       | 13.60                       | 81.88           | 16.53                       | 117.89                  | 39.38                       | 174.93                           | 12.53                       | 87.68                           | 167.47                      | 117.03                  | 36.48                       | 178.38                            | 110.79                      | 36.48                            | 178.38                      | 110.79               | 36.48                       | 178.38                              | 110.79                      | 36.48                            | 178.38                      | 110.79                            | 36.48                       |
| 23.18       | 13.60                       | 81.88           | 16.53                       | 117.89                  | 39.38                       | 174.93                           | 12.53                       | 87.68                           | 167.47                      | 117.03                  | 36.48                       | 178.38                            | 110.79                      | 36.48                            | 178.38                      | 110.79               | 36.48                       | 178.38                              | 110.79                      | 36.48                            | 178.38                      | 110.79                            | 36.48                       |
| 23.18       | 13.60                       | 81.88           | 16.53                       | 117.89                  | 39.38                       | 174.93                           | 12.53                       | 87.68                           | 167.47                      | 117.03                  | 36.48                       | 178.38                            | 110.79                      | 36.48                            | 178.38                      | 110.79               | 36.48                       | 178.38                              | 110.79                      | 36.48                            | 178.38                      | 110.79                            | 36.48                       |
| 23.18       | 13.60                       | 81.88           | 16.53                       | 117.89                  | 39.38                       | 174.93                           | 12.53                       | 87.68                           | 167.47                      | 117.03                  | 36.48                       | 178.38                            | 110.79                      | 36.48                            | 178.38                      | 110.79               | 36.48                       | 178.38                              | 110.79                      | 36.48                            | 178.38                      | 110.79                            | 36.48                       |
| 23.18       | 13.60                       | 81.88           | 16.53                       | 117.89                  | 39.38                       | 174.93                           | 12.53                       | 87.68                           | 167.47                      | 117.03                  | 36.48                       | 178.38                            | 110.79                      | 36.48                            | 178.38                      | 110.79               | 36.48                       | 178.38                              | 110.79                      | 36.48                            | 178.38                      | 110.79                            | 36.48                       |
| 23.18       | 13.60                       | 81.88           | 16.53                       | 117.89                  | 39.38                       | 174.93                           | 12.53                       | 87.68                           | 167.47                      | 117.03                  | 36.48                       | 178.38                            | 110.79                      | 36.48                            | 178.38                      | 110.79               | 36.48                       | 178.38                              | 110.79                      | 36.48                            | 178.38                      | 110.79                            | 36.48                       |
| 23.18       | 13.60                       | 81.88           | 16.53                       | 117.89                  | 39.38                       | 174.93                           | 12.53                       | 87.68                           | 167.47                      | 117.03                  | 36.48                       | 178.38                            | 110.79                      | 36.48                            | 178.38                      | 110.79               | 36.48                       | 178.38                              | 110.79                      | 36.48                            | 178.38                      | 110.79                            | 36.48                       |
| 23.18       | 13.60                       | 81.88           | 16.53                       | 117.89                  | 39.38                       | 174.93                           | 12.53                       | 87.68                           | 167.47                      | 117.03                  | 36.48                       | 178.38                            | 110.79                      | 36.48                            | 178.38                      | 110.79               | 36.48                       | 178.38                              | 110.79                      | 36.48                            | 178.38                      | 110.79                            | 36.48                       |
| 23.18       | 13.60                       | 81.88           | 16.53                       | 117.89                  | 39.38                       | 174.93                           | 12.53                       | 87.68                           | 167.47                      | 117.03                  | 36.48                       | 178.38                            | 110.79                      | 36.48                            | 178.38                      | 110.79               | 36.48                       | 178.38                              | 110.79                      | 36.48                            | 178.38                      | 110.79                            | 36.48                       |
| 23.18       | 13.60                       | 81.88           | 16.53                       | 117.89                  | 39.38                       | 174.93                           | 12.53                       | 87.68                           | 167.47                      | 117.03                  | 36.48                       | 178.38                            | 110.79                      | 36.48                            | 178.38                      | 110.79               | 36.48                       | 178.38                              | 110.79                      | 36.48                            | 178.38                      | 110.79                            | 36.48                       |
| 23.18       | 13.60                       | 81.88           | 16.53                       | 117.89                  | 39.38                       | 174.93                           | 12.53                       | 87.68                           | 167.47                      | 117.03                  | 36.48                       | 178.38                            | 110.79                      | 36.48                            | 178.38                      | 110.79               | 36.48                       | 178.38                              | 110.79                      | 36.48                            | 178.38                      | 110.79                            | 36.48                       |
| 23.18       | 13.60                       | 81.88           | 16.53                       | 117.89                  | 39.38                       | 174.93                           | 12.53                       | 87.68                           | 167.47                      | 117.03                  | 36.48                       | 178.38                            | 110.79                      | 36.48                            | 178.38                      | 110.79               | 36.48                       | 178.38                              | 110.79                      | 36.48                            | 178.38                      | 110.79                            | 36.48                       |
| 23.18       | 13.60                       | 81.88           | 16.53                       | 117.89                  | 39.38                       | 174.93                           | 12.53                       | 87.68                           | 167.47                      | 117.03                  | 36.48                       | 178.38                            | 110.79                      | 36.48                            | 178.38                      | 110.79               | 36.48                       | 178.38                              | 110.79                      | 36.48                            | 178.38                      | 110.79                            | 36.48                       |
| 23.18       | 13.60                       | 81.88           | 16.53                       | 117.89                  | 39.38                       | 174.93                           | 12.53                       | 87.68                           | 167.47                      | 117.03                  | 36.48                       | 178.38                            | 110.79                      | 36.48                            | 178.38                      | 110.79               | 36.48                       | 178.38                              | 110.79                      | 36.48                            | 178.38                      | 110.79                            | 36.48                       |
| 23.18       | 13.60                       | 81.88           | 16.53                       | 117.89                  | 39.38                       | 174.93                           | 12.53                       | 87.68                           | 167.47                      | 117.03                  | 36.48                       | 178.38                            | 110.79                      | 36.48                            | 178.38                      | 110.79               | 36.48                       | 178.38                              | 110.79                      | 36.48                            | 178.38                      | 110.79                            | 36.48                       |
| 23.18       | 13.60                       | 81.88           | 16.53                       | 117.89                  | 39.38                       | 174.93                           | 12.53                       | 87.68                           | 167.47                      | 117.03                  | 36.48                       | 178.38                            | 110.79                      | 36.48                            | 178.38                      | 110.79               | 36.48                       | 178.38                              | 110.79                      | 36.48                            | 178.38                      | 110.79                            | 36.48                       |
| 23.18       | 13.60                       | 81.88           | 16.53                       | 117.89                  | 39.38                       | 174.93                           | 12.53                       | 87.68                           | 167.47                      | 117.03                  | 36.48                       | 178.38                            | 110.79                      | 36.48                            | 178.38                      | 110.79               | 36.48                       | 178.38                              | 110.79                      | 36.48                            | 178.38                      | 110.79                            | 36.48                       |
| 23.18       | 13.60                       | 81.88           | 16.53                       | 117.89                  | 39.38                       | 174.93                           | 12.53                       | 87.68                           | 167.47                      |                         |                             |                                   |                             |                                  |                             |                      |                             |                                     |                             |                                  |                             |                                   |                             |

**Table S3: Overview for all 44 quantified VOCs with group-wise median and percentiles in the room air.**

[illegible]

|                             | Acetone | Acetic acid | Dimethyl sulphide | Pentanal | Limonene |
|-----------------------------|---------|-------------|-------------------|----------|----------|
| <b>LOD</b><br><b>[ppbV]</b> | 0.02    | 2.36        | 3.51              | 9.54     | 1.99     |
| <b>LOQ</b><br><b>[ppbV]</b> | 0.71    | 3.05        | 12.95             | 22.79    | 8.34     |

**Table S4:** LOD and LOQ of the five VOCs of interest.
